# Supplementary material
Source: publisher figshare collection journal article supplement (https://rs.figshare.com/ndownloader/files/13851038)
Supplement: Supplementary file 1 [file 13851038]

## Sheet: HA values
part	tempertaure (°C)	pCO2 (µatm)	skate ID	HA (mg/ccm)	mass (g)	DW (cm)	Body condition	DL (cm)
crus	15	400	T1_1	838.84	1.81	5.32	0.064	3.81
crus	15	400	T1_10	670.5	3.14	4.9	0.131	3.77
crus	15	400	T1_2	567.43	12.57	8.45	0.176	4.6
crus	15	400	T1_3	327.65	2.94	5.1	0.113	4.1
crus	15	400	T1_4	293.96	1.89	5.02	0.075	3.77
crus	15	400	T1_5	1026.99	3.51	5.68	0.109	3.55
crus	15	400	T1_6	206.19	3.63	4.67	0.166	4.51
crus	15	400	T1_7	860.64	3.49	5.81	0.103	4.51
crus	15	400	T1_8	917.58	1.98	5.03	0.078	3.67
crus	15	400	T1_9	367.91	3.85	4.77	0.169	3.4
crus	15	1100	T2_1	951.36	2.23	5.44	0.075	3.77
crus	15	1100	T2_10	1644.89	3.07	5.16	0.115	3.25
crus	15	1100	T2_2	670.35	2.08	5.65	0.065	3.38
crus	15	1100	T2_3	882.47	1.74	5.22	0.064	4.6
crus	15	1100	T2_4	765.44	2.19	5.64	0.069	4.02
crus	15	1100	T2_5	1686.2	1.95	4.88	0.082	4.06
crus	15	1100	T2_6	1477.51	3.78	5.11	0.145	3.53
crus	15	1100	T2_7	1714.96	1.75	5.1	0.067	3.08
crus	15	1100	T2_8	1653.05	2.04	4.62	0.096	3.06
crus	15	1100	T2_9	1693.88	2.88	4.38	0.15	3.49
crus	20	400	T3_1	986.92	2.02	5.6	0.064	3.96
crus	20	400	T3_10	364.12	1.25	5.03	0.049	4.43
crus	20	400	T3_11	365.67	1.19	4.9	0.05	3.77
crus	20	400	T3_2	721.17	1.3	5.14	0.049	3.61
crus	20	400	T3_3	1084.98	2.87	5.87	0.083	3.26
crus	20	400	T3_4	865.28	2.67	5.88	0.077	4.43
crus	20	400	T3_5	600.81	2.66	5.93	0.076	3.59
crus	20	400	T3_6	1172.8	4.66	6.29	0.118	4.55
crus	20	400	T3_7	637.57	6.84	6.16	0.18	5.83
crus	20	400	T3_9	987.42	1.41	4.86	0.06	3.29
crus	20	1100	T4_1	1730.23	1.49	7.7	0.025	3.84
crus	20	1100	T4_10	1762.68	2.11	7.14	0.041	3.3
crus	20	1100	T4_2	929.44	2.48	4.94	0.102	3.99
crus	20	1100	T4_3	1691.24	2.23	6.74	0.049	3.77
crus	20	1100	T4_4	1010.67	1.97	5.37	0.068	3.48
crus	20	1100	T4_5	1622.6	2.3	7.94	0.036	4.03
crus	20	1100	T4_6	1460.86	3.19	6.02	0.088	4.26
crus	20	1100	T4_7	1755.24	1.76	7.67	0.03	3.53
crus	20	1100	T4_8	940.04	2.87	6.16	0.076	4.25
crus	20	1100	T4_9	1551.81	2.06	8.82	0.026	3.15
denticle	15	400	T1_1	1178.56	1.81	5.32	0.064	3.81
denticle	15	400	T1_2	1369.44	3.14	4.9	0.131	3.77
denticle	15	400	T1_3	1657.4	12.57	8.45	0.176	4.6
denticle	15	400	T1_4	882.29	2.94	5.1	0.113	4.1
denticle	15	400	T1_5	1759.46	1.89	5.02	0.075	3.77
denticle	15	400	T1_6	1797.44	3.51	5.68	0.109	3.55
denticle	15	400	T1_7	1325.1	3.63	4.67	0.166	4.51
denticle	15	400	T1_8	1241.71	3.49	5.81	0.103	4.51
denticle	15	400	T1_9	1848.41	1.98	5.03	0.078	3.67
denticle	15	1100	T2_1	1448.79	3.85	4.77	0.169	3.4
denticle	15	1100	T2_10	1235.53	2.23	5.44	0.075	3.77
denticle	15	1100	T2_2	1411.74	3.07	5.16	0.115	3.25
denticle	15	1100	T2_3	1636.43	2.08	5.65	0.065	3.38
denticle	15	1100	T2_4	1600.21	1.74	5.22	0.064	4.6
denticle	15	1100	T2_5	2004.7	2.19	5.64	0.069	4.02
denticle	15	1100	T2_6	2605.04	1.95	4.88	0.082	4.06
denticle	15	1100	T2_7	1822.6	3.78	5.11	0.145	3.53
denticle	15	1100	T2_8	1752.2	1.75	5.1	0.067	3.08
denticle	15	1100	T2_9	1596.95	2.04	4.62	0.096	3.06
denticle	20	400	T3_1	1062.94	2.88	4.38	0.15	3.49
denticle	20	400	T3_10	1854.73	2.02	5.6	0.064	3.96
denticle	20	400	T3_11	1459.95	1.25	5.03	0.049	4.43
denticle	20	400	T3_2	1635.8	1.19	4.9	0.05	3.77
denticle	20	400	T3_3	1322.7	1.3	5.14	0.049	3.61
denticle	20	400	T3_4	1672.57	2.87	5.87	0.083	3.26
denticle	20	400	T3_5	1854.13	2.67	5.88	0.077	4.43
denticle	20	400	T3_6	1405.09	2.66	5.93	0.076	3.59
denticle	20	400	T3_7	1146.55	4.66	6.29	0.118	4.55
denticle	20	400	T3_9	996.72	6.84	6.16	0.18	5.83
denticle	20	1100	T4_1	1112.87	1.41	4.86	0.06	3.29
denticle	20	1100	T4_10	1814.8	1.49	7.7	0.025	3.84
denticle	20	1100	T4_2	1443.48	2.11	7.14	0.041	3.3
denticle	20	1100	T4_3	2965.79	2.48	4.94	0.102	3.99
denticle	20	1100	T4_4	1545.06	2.23	6.74	0.049	3.77
denticle	20	1100	T4_5	929.73	1.97	5.37	0.068	3.48
denticle	20	1100	T4_6	967.58	2.3	7.94	0.036	4.03
denticle	20	1100	T4_7	1248.9	3.19	6.02	0.088	4.26
denticle	20	1100	T4_8	1680.05	1.76	7.67	0.03	3.53
denticle	20	1100	T4_9	1818.54	2.87	6.16	0.076	4.25
denticle	15	400	T1_10	1742.97	2.06	8.82	0.026	3.15
jaw	15	400	T1_1	670.77	1.81	5.32	0.064	3.81
jaw	15	400	T1_10	901.82	3.14	4.9	0.131	3.77
jaw	15	400	T1_2	1219.59	12.57	8.45	0.176	4.6
jaw	15	400	T1_3	641.38	2.94	5.1	0.113	4.1
jaw	15	400	T1_4	742.98	1.89	5.02	0.075	3.77
jaw	15	400	T1_5	950.28	3.51	5.68	0.109	3.55
jaw	15	400	T1_6	1006.79	3.63	4.67	0.166	4.51
jaw	15	400	T1_7	904.9	3.49	5.81	0.103	4.51
jaw	15	400	T1_8	690.63	1.98	5.03	0.078	3.67
jaw	15	400	T1_9	690.17	3.85	4.77	0.169	3.4
jaw	15	1100	T2_1	999.14	2.23	5.44	0.075	3.77
jaw	15	1100	T2_10	1750.47	3.07	5.16	0.115	3.25
jaw	15	1100	T2_2	1015.24	2.08	5.65	0.065	3.38
jaw	15	1100	T2_3	778.95	1.74	5.22	0.064	4.6
jaw	15	1100	T2_4	937.29	2.19	5.64	0.069	4.02
jaw	15	1100	T2_5	1615.23	1.95	4.88	0.082	4.06
jaw	15	1100	T2_6	1761.08	3.78	5.11	0.145	3.53
jaw	15	1100	T2_7	1713.63	1.75	5.1	0.067	3.08
jaw	15	1100	T2_8	1527.99	2.04	4.62	0.096	3.06
jaw	15	1100	T2_9	1926.31	2.88	4.38	0.15	3.49
jaw	20	400	T3_1	1226.5	2.02	5.6	0.064	3.96
jaw	20	400	T3_10	530.5	1.25	5.03	0.049	4.43
jaw	20	400	T3_11	479.78	1.19	4.9	0.05	3.77
jaw	20	400	T3_2	745.1	1.3	5.14	0.049	3.61
jaw	20	400	T3_3	1471.57	2.87	5.87	0.083	3.26
jaw	20	400	T3_4	992.32	2.67	5.88	0.077	4.43
jaw	20	400	T3_5	837.87	2.66	5.93	0.076	3.59
jaw	20	400	T3_6	1525.96	4.66	6.29	0.118	4.55
jaw	20	400	T3_7	947.24	6.84	6.16	0.18	5.83
jaw	20	400	T3_9	655.86	1.41	4.86	0.06	3.29
jaw	20	1100	T4_1	822.48	1.49	7.7	0.025	3.84
jaw	20	1100	T4_10	412.72	2.11	7.14	0.041	3.3
jaw	20	1100	T4_2	981.38	2.48	4.94	0.102	3.99
jaw	20	1100	T4_3	863.12	2.23	6.74	0.049	3.77
jaw	20	1100	T4_4	846.61	1.97	5.37	0.068	3.48
jaw	20	1100	T4_5	886.06	2.3	7.94	0.036	4.03
jaw	20	1100	T4_6	1265.74	3.19	6.02	0.088	4.26
jaw	20	1100	T4_7	828.89	1.76	7.67	0.03	3.53
jaw	20	1100	T4_8	1288.86	2.87	6.16	0.076	4.25
jaw	20	1100	T4_9	1004.52	2.06	8.82	0.026	3.15
vertebra	15	400	T1_1	1938.3	1.81	5.32	0.064	3.81
vertebra	15	400	T1_10	758.27	3.14	4.9	0.131	3.77
vertebra	15	400	T1_2	1151.61	12.57	8.45	0.176	4.6
vertebra	15	400	T1_3	1086.9	2.94	5.1	0.113	4.1
vertebra	15	400	T1_4	929.9	1.89	5.02	0.075	3.77
vertebra	15	400	T1_5	2076.79	3.51	5.68	0.109	3.55
vertebra	15	400	T1_6	1145.85	3.63	4.67	0.166	4.51
vertebra	15	400	T1_7	1786.73	3.49	5.81	0.103	4.51
vertebra	15	400	T1_8	1386.69	1.98	5.03	0.078	3.67
vertebra	15	400	T1_9	1494.27	3.85	4.77	0.169	3.4
vertebra	15	1100	T2_1	1737.87	2.23	5.44	0.075	3.77
vertebra	15	1100	T2_10	1007.65	3.07	5.16	0.115	3.25
vertebra	15	1100	T2_2	1850.2	2.08	5.65	0.065	3.38
vertebra	15	1100	T2_3	1270.33	1.74	5.22	0.064	4.6
vertebra	15	1100	T2_4	1259.51	2.19	5.64	0.069	4.02
vertebra	15	1100	T2_5	528.48	1.95	4.88	0.082	4.06
vertebra	15	1100	T2_6	1421.08	3.78	5.11	0.145	3.53
vertebra	15	1100	T2_7	1055.48	1.75	5.1	0.067	3.08
vertebra	15	1100	T2_8	1033.48	2.04	4.62	0.096	3.06
vertebra	15	1100	T2_9	1263.61	2.88	4.38	0.15	3.49
vertebra	20	400	T3_1	2028.71	2.02	5.6	0.064	3.96
vertebra	20	400	T3_10	620.16	1.25	5.03	0.049	4.43
vertebra	20	400	T3_11	914.01	1.19	4.9	0.05	3.77
vertebra	20	400	T3_2	1154.94	1.3	5.14	0.049	3.61
vertebra	20	400	T3_3	2456.51	2.87	5.87	0.083	3.26
vertebra	20	400	T3_4	1972.77	2.67	5.88	0.077	4.43
vertebra	20	400	T3_5	1021.93	2.66	5.93	0.076	3.59
vertebra	20	400	T3_6	2108.72	4.66	6.29	0.118	4.55
vertebra	20	400	T3_7	922.49	6.84	6.16	0.18	5.83
vertebra	20	400	T3_9	1065.32	1.41	4.86	0.06	3.29
vertebra	20	1100	T4_1	1707.28	1.49	7.7	0.025	3.84
vertebra	20	1100	T4_10	1095.3	2.11	7.14	0.041	3.3
vertebra	20	1100	T4_2	1385.74	2.48	4.94	0.102	3.99
vertebra	20	1100	T4_3	868.4	2.23	6.74	0.049	3.77
vertebra	20	1100	T4_4	1439.7	1.97	5.37	0.068	3.48
vertebra	20	1100	T4_5	1168.83	2.3	7.94	0.036	4.03
vertebra	20	1100	T4_6	1878.12	3.19	6.02	0.088	4.26
vertebra	20	1100	T4_7	602.98	1.76	7.67	0.03	3.53
vertebra	20	1100	T4_8	2040.98	2.87	6.16	0.076	4.25
vertebra	20	1100	T4_9	1085.37	2.06	8.82	0.026	3.15
wing	15	400	T1_1	680.44	1.81	5.32	0.064	3.81
wing	15	400	T1_10	1072.11	3.14	4.9	0.131	3.77
wing	15	400	T1_2	916.6	12.57	8.45	0.176	4.6
wing	15	400	T1_3	802.52	2.94	5.1	0.113	4.1
wing	15	400	T1_4	692.22	1.89	5.02	0.075	3.77
wing	15	400	T1_5	799.05	3.51	5.68	0.109	3.55
wing	15	400	T1_6	911.72	3.63	4.67	0.166	4.51
wing	15	400	T1_7	925.83	3.49	5.81	0.103	4.51
wing	15	400	T1_8	819.59	1.98	5.03	0.078	3.67
wing	15	400	T1_9	639.98	3.85	4.77	0.169	3.4
wing	15	1100	T2_1	437.27	2.23	5.44	0.075	3.77
wing	15	1100	T2_10	567.1	3.07	5.16	0.115	3.25
wing	15	1100	T2_2	728.35	2.08	5.65	0.065	3.38
wing	15	1100	T2_3	736.36	1.74	5.22	0.064	4.6
wing	15	1100	T2_4	719.8	2.19	5.64	0.069	4.02
wing	15	1100	T2_5	604.56	1.95	4.88	0.082	4.06
wing	15	1100	T2_6	762.44	3.78	5.11	0.145	3.53
wing	15	1100	T2_7	656.74	1.75	5.1	0.067	3.08
wing	15	1100	T2_8	671.71	2.04	4.62	0.096	3.06
wing	15	1100	T2_9	551.75	2.88	4.38	0.15	3.49
wing	20	400	T3_1	689.72	2.02	5.6	0.064	3.96
wing	20	400	T3_10	73.28	1.25	5.03	0.049	4.43
wing	20	400	T3_11	306.89	1.19	4.9	0.05	3.77
wing	20	400	T3_2	261.47	1.3	5.14	0.049	3.61
wing	20	400	T3_3	509.83	2.87	5.87	0.083	3.26
wing	20	400	T3_4	1166.62	2.67	5.88	0.077	4.43
wing	20	400	T3_5	308.22	2.66	5.93	0.076	3.59
wing	20	400	T3_6	992.99	4.66	6.29	0.118	4.55
wing	20	400	T3_7	196.01	6.84	6.16	0.18	5.83
wing	20	400	T3_9	231.25	1.41	4.86	0.06	3.29
wing	20	1100	T4_1	65.61	1.49	7.7	0.025	3.84
wing	20	1100	T4_10	375.45	2.11	7.14	0.041	3.3
wing	20	1100	T4_2	501.35	2.48	4.94	0.102	3.99
wing	20	1100	T4_3	233.42	2.23	6.74	0.049	3.77
wing	20	1100	T4_4	643.98	1.97	5.37	0.068	3.48
wing	20	1100	T4_5	235.27	2.3	7.94	0.036	4.03
wing	20	1100	T4_6	417.63	3.19	6.02	0.088	4.26
wing	20	1100	T4_7	311.5	1.76	7.67	0.03	3.53
wing	20	1100	T4_8	660.67	2.87	6.16	0.076	4.25
wing	20	1100	T4_9	340.84	2.06	8.82	0.026	3.15

## Sheet: measurements cartilage + skates
Skate ID	temperature (°C)	pCO2 (µam)	part	measurement (cm)	total mass of skate (g)	disc width (cm)	body condition (g/cm^2)	disc length (cm)
T1_1	15	400	jaw	1.29	1.81	5.32	0.0639522	3.81
T1_1	15	400	vertebra	0.2	1.81	5.32	0.0639522	3.81
T1_1	15	400	wing	2.56	1.81	5.32	0.0639522	3.81
T1_1	15	400	crus	3.5	1.81	5.32	0.0639522	3.81
T1_10	15	400	jaw	1.466	3.14	4.9	0.130779	3.77
T1_10	15	400	vertebra	0.1903	3.14	4.9	0.130779	3.77
T1_10	15	400	wing	2.03	3.14	4.9	0.130779	3.77
T1_10	15	400	crus	1.192	3.14	4.9	0.130779	3.77
T1_2	15	400	jaw	2.404	12.57	8.45	0.176044	4.6
T1_2	15	400	vertebra	0.342	12.57	8.45	0.176044	4.6
T1_2	15	400	wing	4.19	12.57	8.45	0.176044	4.6
T1_2	15	400	crus	1.807	12.57	8.45	0.176044	4.6
T1_3	15	400	jaw	1.455	2.94	5.1	0.113033	4.1
T1_3	15	400	vertebra	0.2406	2.94	5.1	0.113033	4.1
T1_3	15	400	wing	2	2.94	5.1	0.113033	4.1
T1_3	15	400	crus	1.288	2.94	5.1	0.113033	4.1
T1_4	15	400	jaw	1.433	1.89	5.02	0.0749988	3.77
T1_4	15	400	vertebra	0.2127	1.89	5.02	0.0749988	3.77
T1_4	15	400	wing	2.17	1.89	5.02	0.0749988	3.77
T1_4	15	400	crus	1.364	1.89	5.02	0.0749988	3.77
T1_5	15	400	jaw	1.33	3.51	5.68	0.108795	3.55
T1_5	15	400	vertebra	0.17	3.51	5.68	0.108795	3.55
T1_5	15	400	wing	2.89	3.51	5.68	0.108795	3.55
T1_5	15	400	crus	1.83	3.51	5.68	0.108795	3.55
T1_6	15	400	jaw	1.433	3.63	4.67	0.166446	4.51
T1_6	15	400	vertebra	0.2059	3.63	4.67	0.166446	4.51
T1_6	15	400	wing	2.07	3.63	4.67	0.166446	4.51
T1_6	15	400	crus	1.504	3.63	4.67	0.166446	4.51
T1_7	15	400	jaw	1.45	3.49	5.81	0.103389	4.51
T1_7	15	400	vertebra	0.2	3.49	5.81	0.103389	4.51
T1_7	15	400	wing	2.59	3.49	5.81	0.103389	4.51
T1_7	15	400	crus	1.12	3.49	5.81	0.103389	4.51
T1_8	15	400	jaw	1.4	1.98	5.03	0.0782581	3.67
T1_8	15	400	vertebra	0.21	1.98	5.03	0.0782581	3.67
T1_8	15	400	wing	2.59	1.98	5.03	0.0782581	3.67
T1_8	15	400	crus	3.61	1.98	5.03	0.0782581	3.67
T1_9	15	400	jaw	1.523	3.85	4.77	0.169209	3.4
T1_9	15	400	vertebra	0.4337	3.85	4.77	0.169209	3.4
T1_9	15	400	wing	2.08	3.85	4.77	0.169209	3.4
T1_9	15	400	crus	1.131	3.85	4.77	0.169209	3.4
T2_1	15	1100	jaw	1.57	2.23	5.44	0.0753541	3.77
T2_1	15	1100	vertebra	0.15	2.23	5.44	0.0753541	3.77
T2_1	15	1100	wing	2.66	2.23	5.44	0.0753541	3.77
T2_1	15	1100	crus	2.49	2.23	5.44	0.0753541	3.77
T2_10	15	1100	jaw	1.358	3.07	5.16	0.115303	3.25
T2_10	15	1100	vertebra	0.4173	3.07	5.16	0.115303	3.25
T2_10	15	1100	wing	2.16	3.07	5.16	0.115303	3.25
T2_10	15	1100	crus	1.388	3.07	5.16	0.115303	3.25
T2_2	15	1100	jaw	1.55	2.08	5.65	0.0651578	3.38
T2_2	15	1100	vertebra	0.64	2.08	5.65	0.0651578	3.38
T2_2	15	1100	wing	2.67	2.08	5.65	0.0651578	3.38
T2_2	15	1100	crus	2.25	2.08	5.65	0.0651578	3.38
T2_3	15	1100	jaw	1.21	1.74	5.22	0.063857	4.6
T2_3	15	1100	vertebra	0.19	1.74	5.22	0.063857	4.6
T2_3	15	1100	wing	2.52	1.74	5.22	0.063857	4.6
T2_3	15	1100	crus	1.17	1.74	5.22	0.063857	4.6
T2_4	15	1100	jaw	1.24	2.19	5.64	0.0688471	4.02
T2_4	15	1100	vertebra	0.25	2.19	5.64	0.0688471	4.02
T2_4	15	1100	wing	2.75	2.19	5.64	0.0688471	4.02
T2_4	15	1100	crus	1.28	2.19	5.64	0.0688471	4.02
T2_5	15	1100	jaw	1.365	1.95	4.88	0.0818832	4.06
T2_5	15	1100	vertebra	0.1742	1.95	4.88	0.0818832	4.06
T2_5	15	1100	wing	2.11	1.95	4.88	0.0818832	4.06
T2_5	15	1100	crus	1.006	1.95	4.88	0.0818832	4.06
T2_6	15	1100	jaw	1.442	3.78	5.11	0.14476	3.53
T2_6	15	1100	vertebra	0.2369	3.78	5.11	0.14476	3.53
T2_6	15	1100	wing	2.52	3.78	5.11	0.14476	3.53
T2_6	15	1100	crus	0.979	3.78	5.11	0.14476	3.53
T2_7	15	1100	jaw	1.293	1.75	5.1	0.0672818	3.08
T2_7	15	1100	vertebra	0.399	1.75	5.1	0.0672818	3.08
T2_7	15	1100	wing	2.17	1.75	5.1	0.0672818	3.08
T2_7	15	1100	crus	1.05	1.75	5.1	0.0672818	3.08
T2_8	15	1100	jaw	1.315	2.04	4.62	0.0955754	3.06
T2_8	15	1100	vertebra	0.3971	2.04	4.62	0.0955754	3.06
T2_8	15	1100	wing	1.9	2.04	4.62	0.0955754	3.06
T2_8	15	1100	crus	1.265	2.04	4.62	0.0955754	3.06
T2_9	15	1100	jaw	1.359	2.88	4.38	0.150122	3.49
T2_9	15	1100	vertebra	0.216	2.88	4.38	0.150122	3.49
T2_9	15	1100	wing	2	2.88	4.38	0.150122	3.49
T2_9	15	1100	crus	1.297	2.88	4.38	0.150122	3.49
T3_1	20	400	jaw	1.72	2.02	5.6	0.0644133	3.96
T3_1	20	400	vertebra	0.22	2.02	5.6	0.0644133	3.96
T3_1	20	400	wing	2.74	2.02	5.6	0.0644133	3.96
T3_1	20	400	crus	2.23	2.02	5.6	0.0644133	3.96
T3_10	20	400	jaw	1.322	1.25	5.03	0.0494054	4.43
T3_10	20	400	vertebra	0.468	1.25	5.03	0.0494054	4.43
T3_10	20	400	wing	2.31	1.25	5.03	0.0494054	4.43
T3_10	20	400	crus	1.375	1.25	5.03	0.0494054	4.43
T3_11	20	400	jaw	1.35	1.19	4.9	0.0495627	3.77
T3_11	20	400	vertebra	0.2579	1.19	4.9	0.0495627	3.77
T3_11	20	400	wing	2.1	1.19	4.9	0.0495627	3.77
T3_11	20	400	crus	1.103	1.19	4.9	0.0495627	3.77
T3_2	20	400	jaw	1.541	1.3	5.14	0.0492059	3.61
T3_2	20	400	vertebra	0.1073	1.3	5.14	0.0492059	3.61
T3_2	20	400	wing	2.18	1.3	5.14	0.0492059	3.61
T3_2	20	400	crus	1.025	1.3	5.14	0.0492059	3.61
T3_3	20	400	jaw	1.33	2.87	5.87	0.0832925	3.26
T3_3	20	400	vertebra	0.26	2.87	5.87	0.0832925	3.26
T3_3	20	400	wing	2.83	2.87	5.87	0.0832925	3.26
T3_3	20	400	crus	2.29	2.87	5.87	0.0832925	3.26
T3_4	20	400	jaw	1.37	2.67	5.88	0.0772248	4.43
T3_4	20	400	vertebra	0.23	2.67	5.88	0.0772248	4.43
T3_4	20	400	wing	2.85	2.67	5.88	0.0772248	4.43
T3_4	20	400	crus	1.28	2.67	5.88	0.0772248	4.43
T3_5	20	400	jaw	1.693	2.66	5.93	0.0756436	3.59
T3_5	20	400	vertebra	0.1448	2.66	5.93	0.0756436	3.59
T3_5	20	400	wing	2.31	2.66	5.93	0.0756436	3.59
T3_5	20	400	crus	0.931	2.66	5.93	0.0756436	3.59
T3_6	20	400	jaw	1.75	4.66	6.29	0.117784	4.55
T3_6	20	400	vertebra	0.2	4.66	6.29	0.117784	4.55
T3_6	20	400	wing	2.92	4.66	6.29	0.117784	4.55
T3_6	20	400	crus	1.79	4.66	6.29	0.117784	4.55
T3_7	20	400	jaw	2.019	6.84	6.16	0.180258	5.83
T3_7	20	400	vertebra	0.1592	6.84	6.16	0.180258	5.83
T3_7	20	400	wing	2.87	6.84	6.16	0.180258	5.83
T3_7	20	400	crus	1.743	6.84	6.16	0.180258	5.83
T3_9	20	400	jaw	1.721	1.41	4.86	0.0596962	3.29
T3_9	20	400	vertebra	0.2759	1.41	4.86	0.0596962	3.29
T3_9	20	400	wing	2.2	1.41	4.86	0.0596962	3.29
T3_9	20	400	crus	1.318	1.41	4.86	0.0596962	3.29
T4_1	20	1100	jaw	1.354	1.49	7.7	0.0251307	3.84
T4_1	20	1100	vertebra	0.2168	1.49	7.7	0.0251307	3.84
T4_1	20	1100	wing	3.59	1.49	7.7	0.0251307	3.84
T4_1	20	1100	crus	1.262	1.49	7.7	0.0251307	3.84
T4_10	20	1100	jaw	1.233	2.11	7.14	0.0413891	3.3
T4_10	20	1100	vertebra	0.3144	2.11	7.14	0.0413891	3.3
T4_10	20	1100	wing	3.39	2.11	7.14	0.0413891	3.3
T4_10	20	1100	crus	1.071	2.11	7.14	0.0413891	3.3
T4_2	20	1100	jaw	1.48	2.48	4.94	0.101624	3.99
T4_2	20	1100	vertebra	0.14	2.48	4.94	0.101624	3.99
T4_2	20	1100	wing	2.63	2.48	4.94	0.101624	3.99
T4_2	20	1100	crus	1	2.48	4.94	0.101624	3.99
T4_3	20	1100	jaw	1.213	2.23	6.74	0.0490891	3.77
T4_3	20	1100	vertebra	0.104	2.23	6.74	0.0490891	3.77
T4_3	20	1100	wing	2.8	2.23	6.74	0.0490891	3.77
T4_3	20	1100	crus	1.029	2.23	6.74	0.0490891	3.77
T4_4	20	1100	jaw	1.26	1.97	5.37	0.0683152	3.48
T4_4	20	1100	vertebra	0.25	1.97	5.37	0.0683152	3.48
T4_4	20	1100	wing	2.61	1.97	5.37	0.0683152	3.48
T4_4	20	1100	crus	0.65	1.97	5.37	0.0683152	3.48
T4_5	20	1100	jaw	1.381	2.3	7.94	0.0364827	4.03
T4_5	20	1100	vertebra	0.3148	2.3	7.94	0.0364827	4.03
T4_5	20	1100	wing	3.7	2.3	7.94	0.0364827	4.03
T4_5	20	1100	crus	1.126	2.3	7.94	0.0364827	4.03
T4_6	20	1100	jaw	1.52	3.19	6.02	0.0880233	4.26
T4_6	20	1100	vertebra	0.21	3.19	6.02	0.0880233	4.26
T4_6	20	1100	wing	2.89	3.19	6.02	0.0880233	4.26
T4_6	20	1100	crus	1.09	3.19	6.02	0.0880233	4.26
T4_7	20	1100	jaw	1.219	1.76	7.67	0.0299173	3.53
T4_7	20	1100	vertebra	0.2241	1.76	7.67	0.0299173	3.53
T4_7	20	1100	wing	3.29	1.76	7.67	0.0299173	3.53
T4_7	20	1100	crus	1.23	1.76	7.67	0.0299173	3.53
T4_8	20	1100	jaw	1.42	2.87	6.16	0.0756346	4.25
T4_8	20	1100	vertebra	0.22	2.87	6.16	0.0756346	4.25
T4_8	20	1100	wing	2.89	2.87	6.16	0.0756346	4.25
T4_8	20	1100	crus	1.34	2.87	6.16	0.0756346	4.25
T4_9	20	1100	jaw	1.163	2.06	8.82	0.0264807	3.15
T4_9	20	1100	vertebra	0.2574	2.06	8.82	0.0264807	3.15
T4_9	20	1100	wing	4.04	2.06	8.82	0.0264807	3.15
T4_9	20	1100	crus	1.117	2.06	8.82	0.0264807	3.15

## Sheet: skates ID and measurements
Skate ID	mass (g)	DW (cm)	Body condition	DL (cm)
T1_1	1.81	5.32	0.064	3.81
T1_10	3.14	4.9	0.131	3.77
T1_2	12.57	8.45	0.176	4.6
T1_3	2.94	5.1	0.113	4.1
T1_4	1.89	5.02	0.075	3.77
T1_5	3.51	5.68	0.109	3.55
T1_6	3.63	4.67	0.166	4.51
T1_7	3.49	5.81	0.103	4.51
T1_8	1.98	5.03	0.078	3.67
T1_9	3.85	4.77	0.169	3.4
T2_1	2.23	5.44	0.075	3.77
T2_10	3.07	5.16	0.115	3.25
T2_2	2.08	5.65	0.065	3.38
T2_3	1.74	5.22	0.064	4.6
T2_4	2.19	5.64	0.069	4.02
T2_5	1.95	4.88	0.082	4.06
T2_6	3.78	5.11	0.145	3.53
T2_7	1.75	5.1	0.067	3.08
T2_8	2.04	4.62	0.096	3.06
T2_9	2.88	4.38	0.15	3.49
T3_1	2.02	5.6	0.064	3.96
T3_10	1.25	5.03	0.049	4.43
T3_11	1.19	4.9	0.05	3.77
T3_2	1.3	5.14	0.049	3.61
T3_3	2.87	5.87	0.083	3.26
T3_4	2.67	5.88	0.077	4.43
T3_5	2.66	5.93	0.076	3.59
T3_6	4.66	6.29	0.118	4.55
T3_7	6.84	6.16	0.18	5.83
T3_9	1.41	4.86	0.06	3.29
T4_1	1.49	7.7	0.025	3.84
T4_10	2.11	7.14	0.041	3.3
T4_2	2.48	4.94	0.102	3.99
T4_3	2.23	6.74	0.049	3.77
T4_4	1.97	5.37	0.068	3.48
T4_5	2.3	7.94	0.036	4.03
T4_6	3.19	6.02	0.088	4.26
T4_7	1.76	7.67	0.03	3.53
T4_8	2.87	6.16	0.076	4.25
T4_9	2.06	8.82	0.026	3.15
